# Supplementary material
Source: Springer Nature journal article supplement (https://www.springermedizin.de/resource/supplementary/12879_2012_2249_MOESM1_ESM.pdf/9443364)
Supplement: MOESM1 [file 9443364]

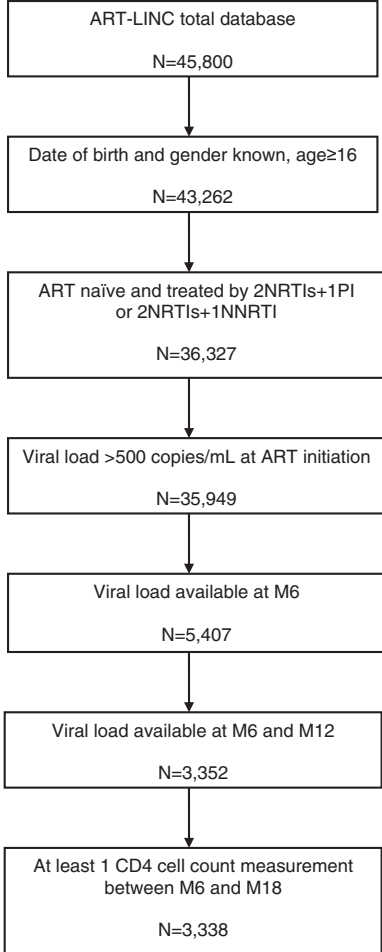

ART: Antiretroviral treatment

NNRTI: Non-nucleoside reverse transcriptase inhibitor

NRTI: Nucleoside reverse transcriptase inhibitor

PI: Protease inhibitor
